# Supplementary material for: Construction of Te-ZnO@S-g-C3N4 Heterojunction Nanocomposites for the Efficient Removal of Methylene Blue, Antifungal Activity, and Adsorption of Cr(VI) Ion
Source: Hindawi journal article supplement (doi:10.1155/2023/6736182), 2023-01-01
Supplement: f1 [file 6736182.f1.docx]

**Supporting Information**

**Construction of Te-ZnO@S-g-C3N4 Heterojunction Nanocomposites for the Efficient Removal of Methylene Blue, Antifungal Activity, and adsorption of Cr(IV) Ion**

Komal Aroosh1, Mohsin Javed1, Nadia Hussain2,3, Ahmad Alhujaily4, Shahid Iqbal5, Mohammed T. Alotaibi6, Muhammad Faizan1, Muhammad Shuaib Khan7, Ali Bahadur8, Muhammad Abdul Qayyum9, Nasser S. Awwad10, Yosef Jazaa11, Foziah F. Al-Fawzan12*, Eslam B. Elkaeed13

*1Department of Chemistry, School of Science, University of Management and Technology, Lahore 54770, Pakistan.*

*2Department of Pharmaceutical Sciences, College of Pharmacy, Al Ain University, Al Ain.*

*3AAU Health and Biomedical Research center, Al Ain University, Abu Dhabi, UAE.*

*4Biology Department, College of Science, Taibah University, Al Madinah Al Munawarah 41477, Saudi Arabia.*

*5Department of Chemistry, School of Natural Sciences (SNS), National University of Science and Technology (NUST), H-12, Islamabad, 46000, Pakistan.*

*6Department of Chemistry, Turabah University College, Taif University, P.O. Box 11099, Taif 21944, Saudi Arabia.*

*7State Key Laboratory of Catalysis, iChEM, Dalian Institute of Chemical Physics, Chinese Academy of Sciences, Dalian National Laboratory for Clean Energy, Dalian, 116023, Liaoning China.*

*8Department of Chemistry, College of Science and Technology, Wenzhou-Kean University, Wenzhou 325060, China.*

*9Department of Chemistry, Division of Science & Technology, University of Education, Lahore, Pakistan.*

*10Chemistry Department, Faculty of Science, King Khalid University, P.O. Box 9004, Abha 61413, Saudi Arabia.*

*11Faculty of Engineering, King Khalid University, P.O. Box 9004, Abha 61413, Saudi Arabia.*

*12Department of Chemistry, College of Science, Princess Nourah bint Abdulrahman University, P.O. Box 84428, Riyadh 11671, Saudi Arabia.*

*13Department of Pharmaceutical Sciences, College of Pharmacy, AlMaarefa University, Riyadh 13713, Saudi Arabia.*

****To whom corresponding should be addressed***

[ffalfozan@pnu.edu.sa](mailto:ffalfozan@pnu.edu.sa) (Foziah F. Al-Fawzan)

**2.5** **Characterization**

An X-ray diffractometer (XRD, Bruker AXS, D8-S4) and SEM-EDS (Hitachi, S-4800) were used to characterize the structure, morphology and elements present in the constructed nanocatalysts (NCs), respectively. SEM images were utilized to calculate particle size through ImageJ software. The existence of distinct functional groups inside the constructed NCs was determined by using a Fourier transform infrared (Perkin 400 FT-IR) spectrometer. The photocatalytic nature of synthesized nanocatalysts (NCs) and UV-visible absorption spectra was assessed by using a UV-vis-NIR spectrophotometer (UV-770, JESCO). Tauc plot was drawn using absorbance data obtained from the UV-vis spectrophotometric reading of solid samples at room temperature. On a Kratos Axis-Ultra multifunctional X-ray spectrometer, XPS evaluations were carried out. To precisely the shift created by the charge effect, all BEs were consistent with respect to the C1s peak (284.8 eV) of the surface adventitious C. Through N2 adsorption in an electronic gas-sorption machine, the Micromeritics ASAP 2020 equipment was used to inspect the BET surface area. With a signal amplitude of 20 mV, the EIS was evaluated at -0.6 V (vs. Ag/AgCl) from 105 to 0.1 Hz.

**2.6.** **Photocatalytic degradation of MB**

In the presence of sunlight, photocatalytic tests were conducted employing synthesized samples to disintegrate the common organic pollutant methylene blue (MB). The standard contaminant, MB, was an aqueous solution. To establish the state of adsorption-desorption equilibrium, a slurry containing a catalytic load of 2 mg was added to 100 ml of MB dye solution (10 mg L-1) for each sample solution. The mixture was then agitated in the dark for around 30 minutes. The suspension was then exposed to sunlight, with 5 ml aliquots being taken out at regular intervals of 30 minutes. After centrifugation, the photocatalytic efficacy of the resulting suspensions was evaluated using a UV-Vis spectrophotometer. UV adsorption spectra were recorded between 200-795 nm wavelengths for every sample at frequent intervals.

**2.7.** **Adsorption study of heavy metal ions**

Adsorption is indeed a useful technique for eliminating non-biodegradable heavy metals from water utilizing nanosorbents. Adsorption ability of Te-ZnO, Te-ZnO@SCN was checked by removing heavy metals (Chromium hexavalent ion, Cr(VI) or Cr6+) from an aqueous solution. A stock solution of Cr(VI) was made by dissolving 0.05 g of the metal salt K2Cr2O7 in 1L of deionized water and storing it in the dark. By diluting the Cr(VI) stock solution with deionized water (20 ppm) at its natural pH, the Cr(VI) working solution was created. For the adsorption experiment, slurry containing an adsorbent load of 1 mg in 20 ppm of metal salt solution was prepared in a falcon test tube and placed in a BIOBAS shaker at 170 rpm. 5 ml sample was collected at different intervals of shaking time (0, 30, 60, 90, 120, 150, 180, 210, 240, 360, 720 and 1440 minutes). The solid/liquid phase was filtered using a 0.22 m filter membrane, and their adsorption behaviour was then assessed using a UV-Vis spectrophotometer at a wavelength of 350 nm. The removal percentage for each sample was calculated using the percentage degradation efficiency equation (Equation 1). The process and rate of metal adsorption were investigated using equations 3 and 4 of the linearized equations pseudo-first order and pseudo-second-order kinetic model, respectively.


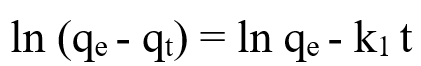
 (3)

= + (4)

Where, respectively, qe and qt stand for the quantities of metal ions adsorbed on the adsorbent in mg g-1 at equilibrium and time t. While K1, which represents the rate of first-order adsorption/min, and K2, which represents the rate constant for second-order adsorption in mg g-1 min-1, respectively. The equilibrium adsorption capacity was calculated using equation (5):

(5)

The adsorption capacity at regular intervals is expressed as qt. The equation for it (qt) is the same as for qe, except qt is a function of time. Additionally, using the h = k2qe2 relation, the initial rate of adsorption, 'h' (mg g-1 min-1), was computed.


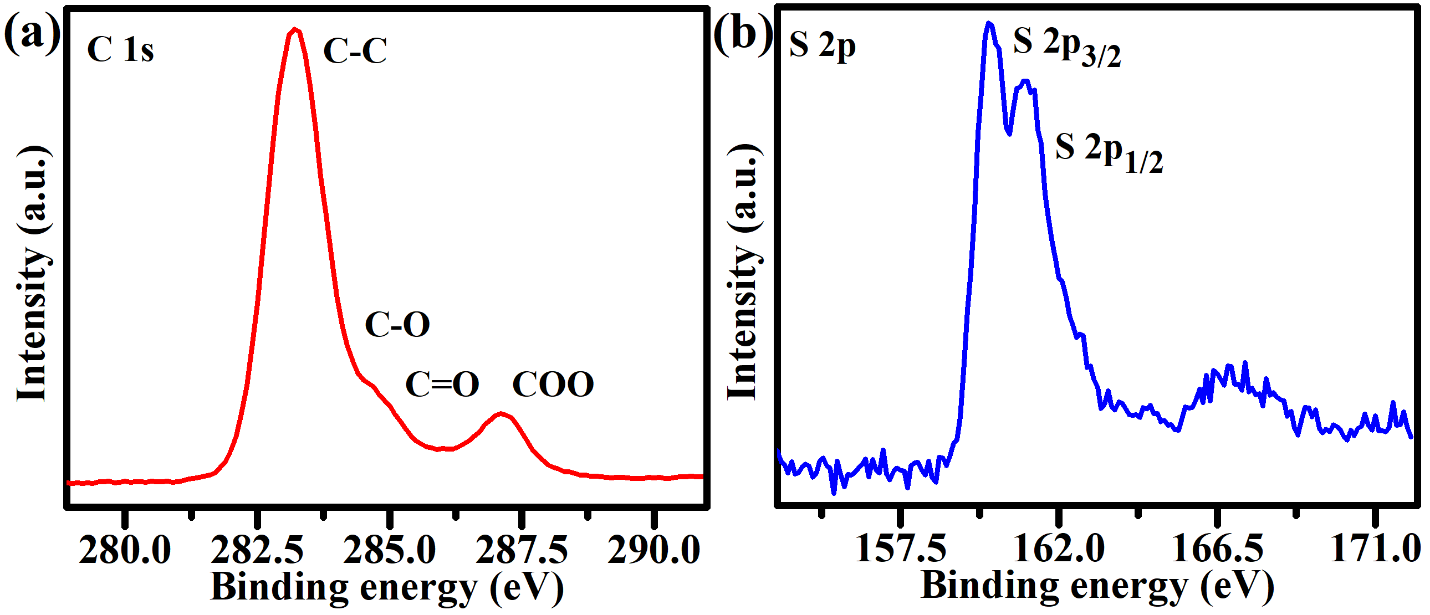


**Figure S1.** High-resolution XPS spectra of Te-ZnO@SCN NCs; (a) C 1s and (b) S 2p.

Under the influence of sunlight, the photocatalytic activity of synthesized samples was assessed. First, using an aqueous methylene blue solution in sunlight, the photocatalytic activities of produced nanoparticles (ZnO and Te-ZnO) were investigated. The results are depicted in Figure 5a. It is clear from the degradation contours (**Figure S2**) that the photocatalytic activity of Te-ZnO NPs rose when the Te+4 doping was raised by up to 3% weight, and thereafter reduced by up to 15% weight.


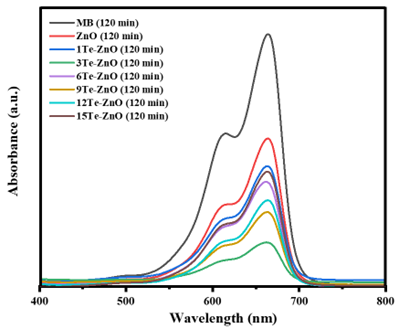


**Figure S2.** MBdegradation contour of ZnOandTe-ZnO NPs.

The samples were exposed to sunshine, and when compared to the other samples, the 3Te-ZnO@40SCN NCs displayed the most dye degradation. The degradation contours (**Figure S3**) clearly reveal that the photocatalytic performance rose as the SCN nanosheet loading increased from 20 to 40%, and then dropped for NCs containing the SCN more than 40%. This improved degradation outcome is essentially the result of improved charge separation and Te-superior ZnO@SCN's visible-light absorption.

The kinetics of Te-ZnO/ (0, 20, 40, 60 and 80 wt.%) S-g-C3N4 NCs were realized using the Langmuir-Hinshelwood model, and the relevant results are shown graphically in **Figure S4**. The kinetic analysis revealed that the NCs' degradation of MB in the presence of sunlight fits to a pseudo-first-order function.


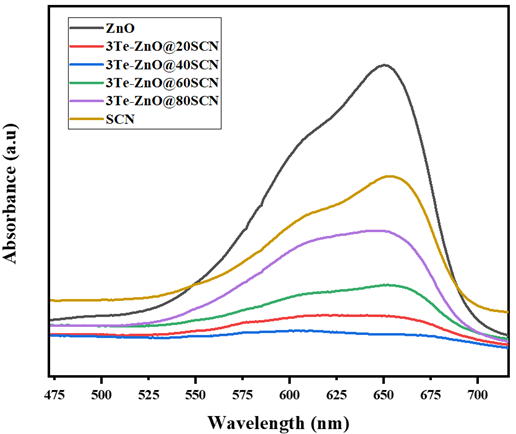


**Figure S3.** Photodegradation of MB by ZnO, SCN and Te-ZnO@SCN NCs under sunlight irradiation for 90 minutes (Degradation contours).


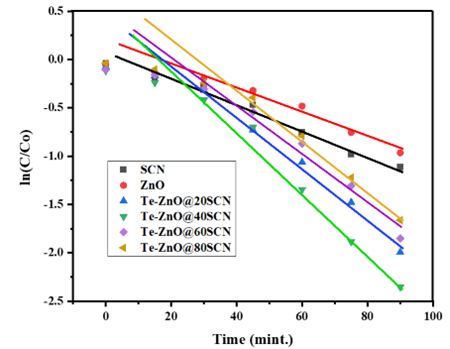


**Figure S4.** Kinetic characteristics of ZnO, SCN and Te-ZnO@SCN NCs against MB.


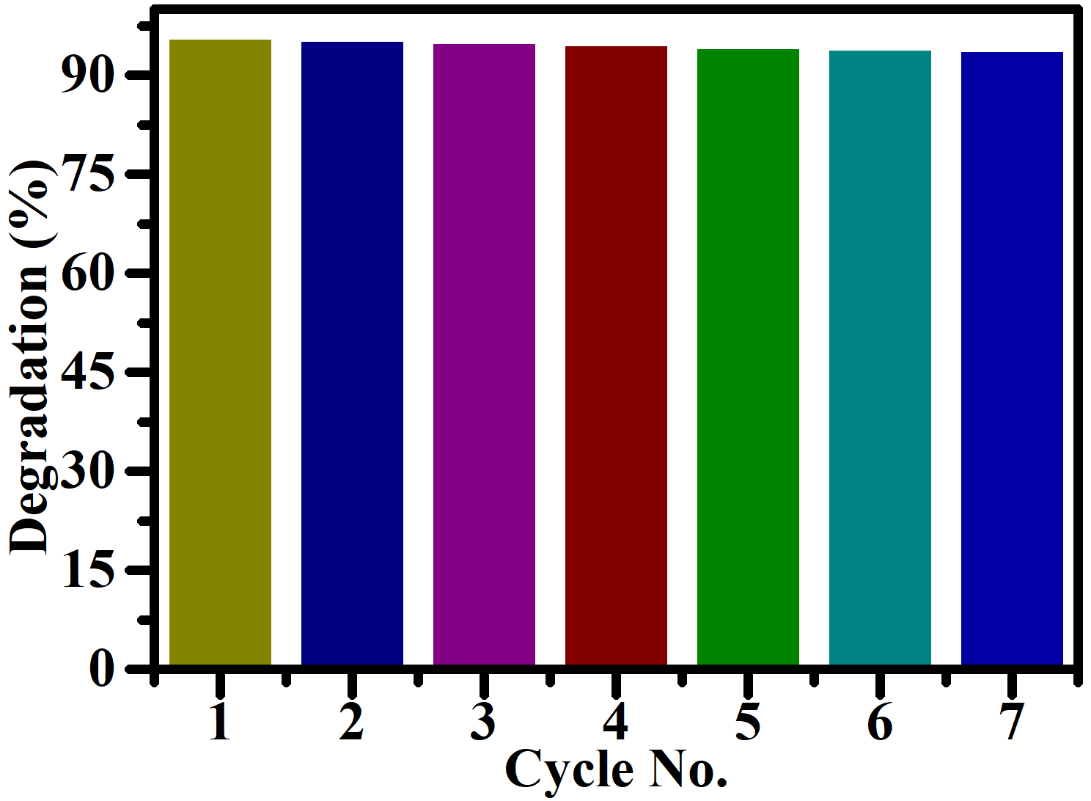


**Figure S5.** 7 consecutive MB photodegradation experiments and the cyclic stability of 3Te-ZnO@40S-g-C3N4 NCs.


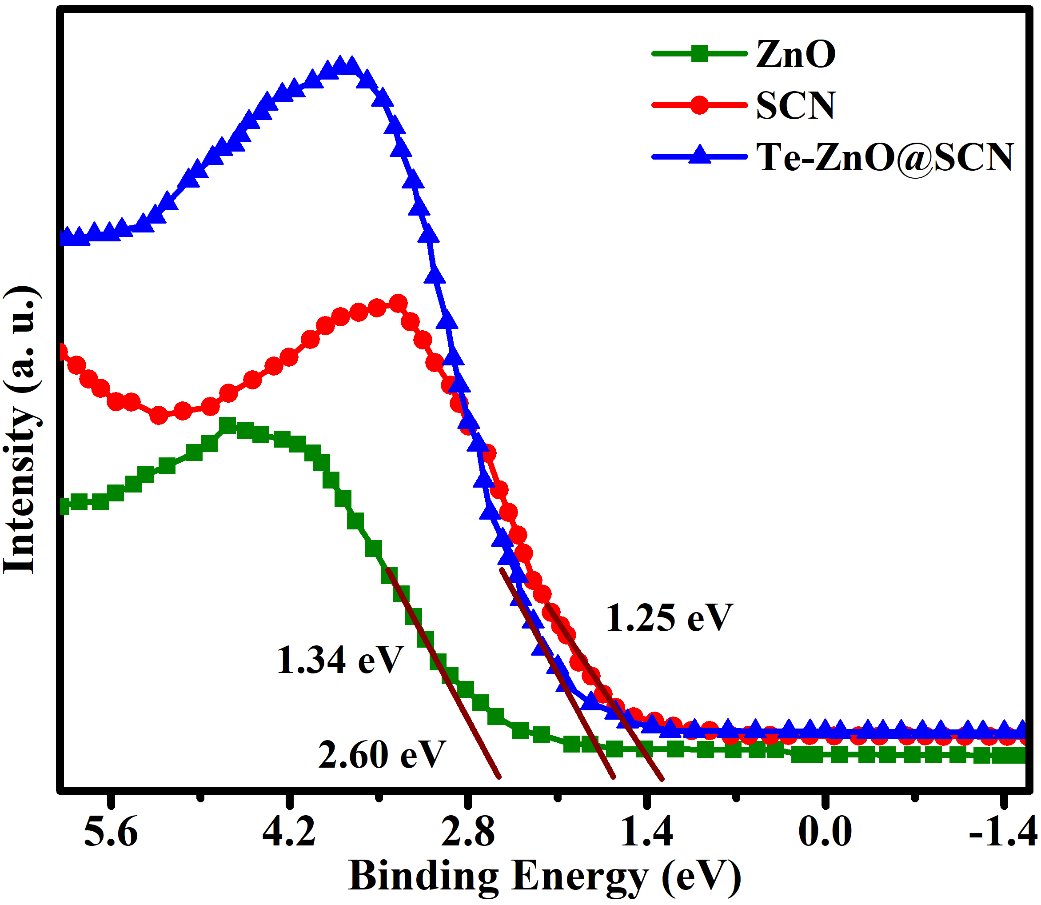


**Figure S6.** Valence-band XPS spectra of ZnO, SCN and Te-ZnO@SCN..


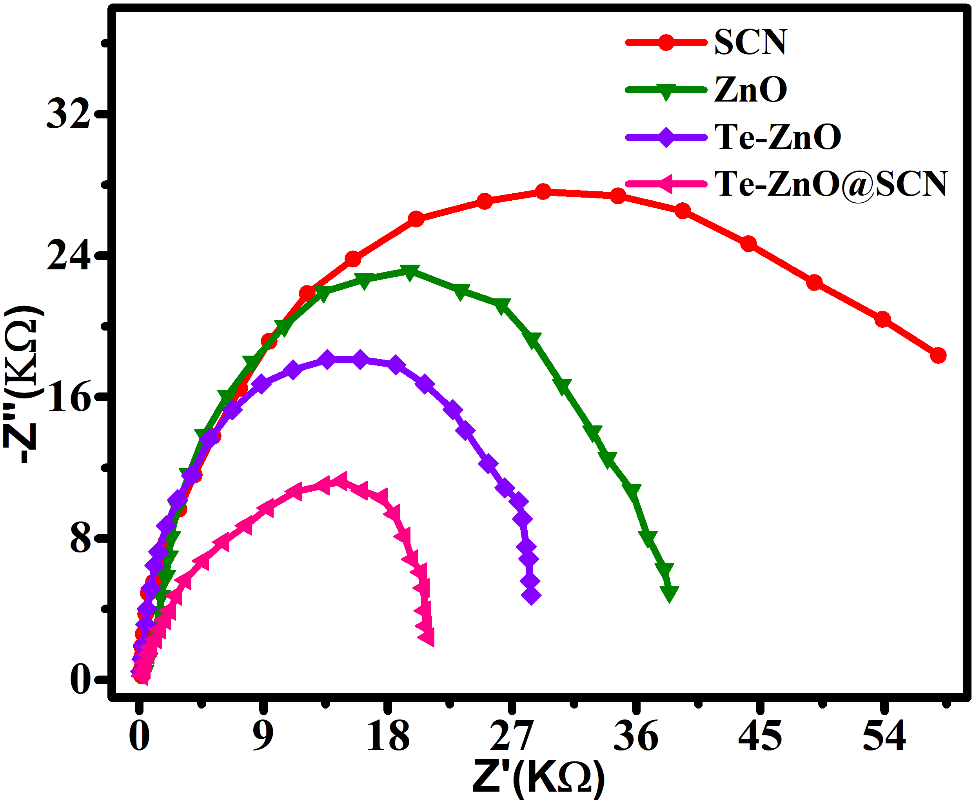


**Figure S7.** EIS Nyquist plots of ZnO, Te-ZnO, SCN and Te-ZnO@SCN.
